# Supplementary material for: DNA Methylation Signatures Predicting Bevacizumab Efficacy in Metastatic Breast Cancer
Source: PubMed Central journal article supplement — Theranostics. 2018 Mar 11;8(8):2278–88. doi: 10.7150/thno.23544 (PMC5928889; doi:10.7150/thno.23544), 2018-03-11
Supplement: thnov08p2278s1.pdf [file thnov08p2278s1.pdf]

**Figure S1.** Differences in methylation status between specimens taken from metastases compared to specimens from primary tumors. (A) Principal component analysis (PCA) of methylation levels of 417 CpGs from metastases samples (red) and primary tumors (blue). (B) Differences in methylation levels (delta beta) between R and NR (x-axis) might be explained (confounded) by differences in methylation levels (delta beta) between metastases samples (METAST) and primary tumors (PRIM) (y-axis) (orange).

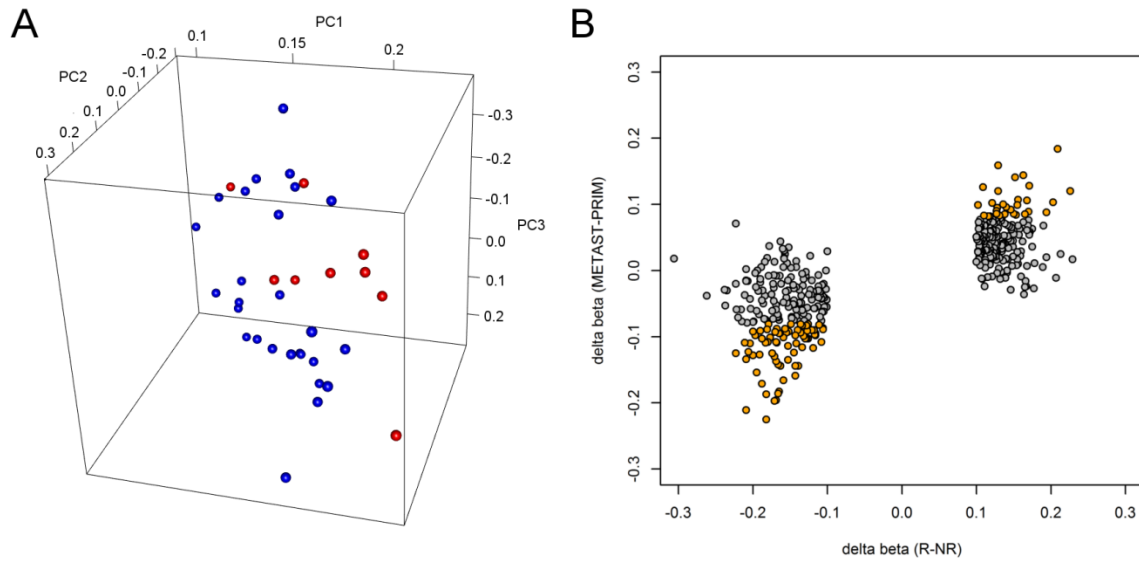

**Figure S2.** Unsupervised hierarchical clustering of the learning set based on the methylation status (z-score of  $\beta$ -values) of the **48 genes** (48 CpGs) selected for further validation in the optimization set and control set, respectively. This panel allowed a good separation between R (Cluster A + Cluster B) and NR (Cluster C) with an odds ratio of 101 ( $P < 0.0001$ ).

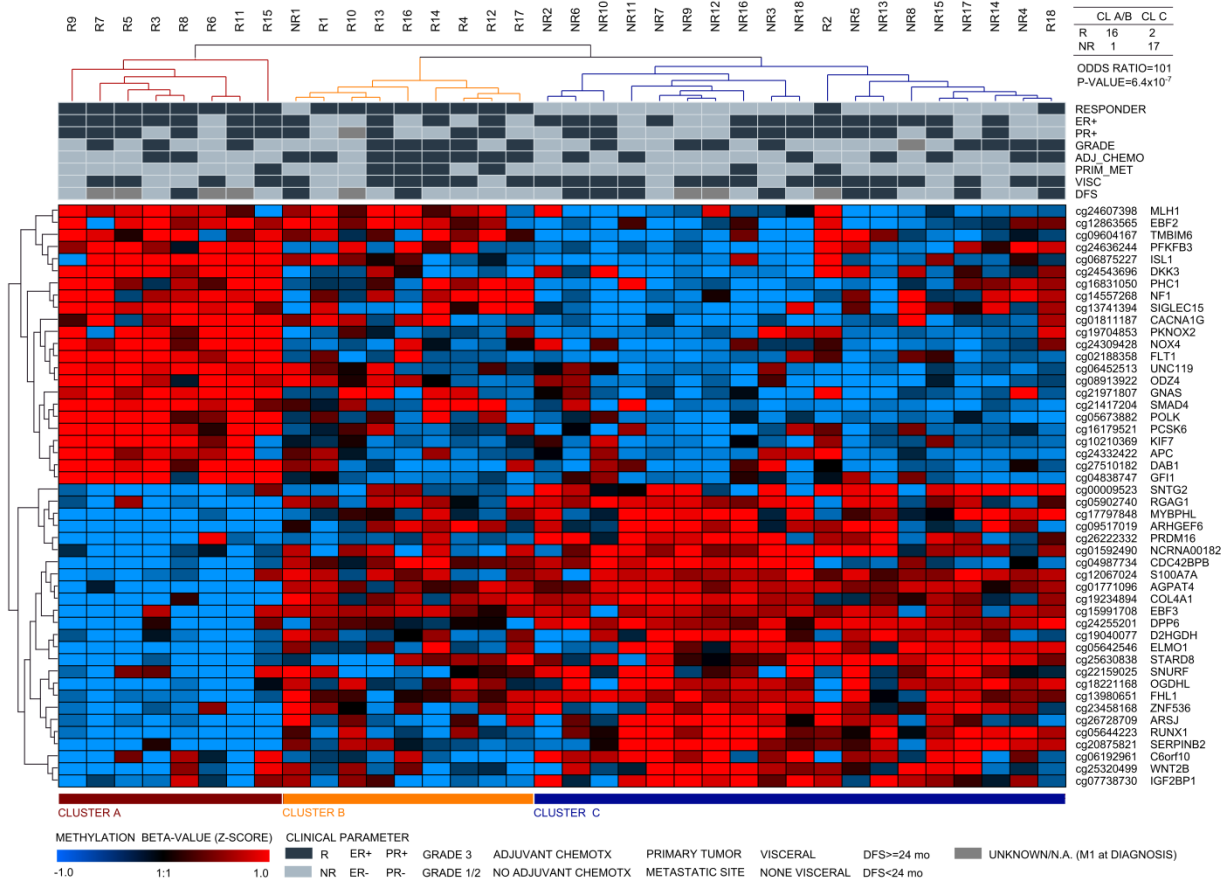

**Figure S3.** Progression-free survival (PFS) and overall survival (OS) for predicted R and predicted NR according to the **9-gene methylation signature** in the optimization set.

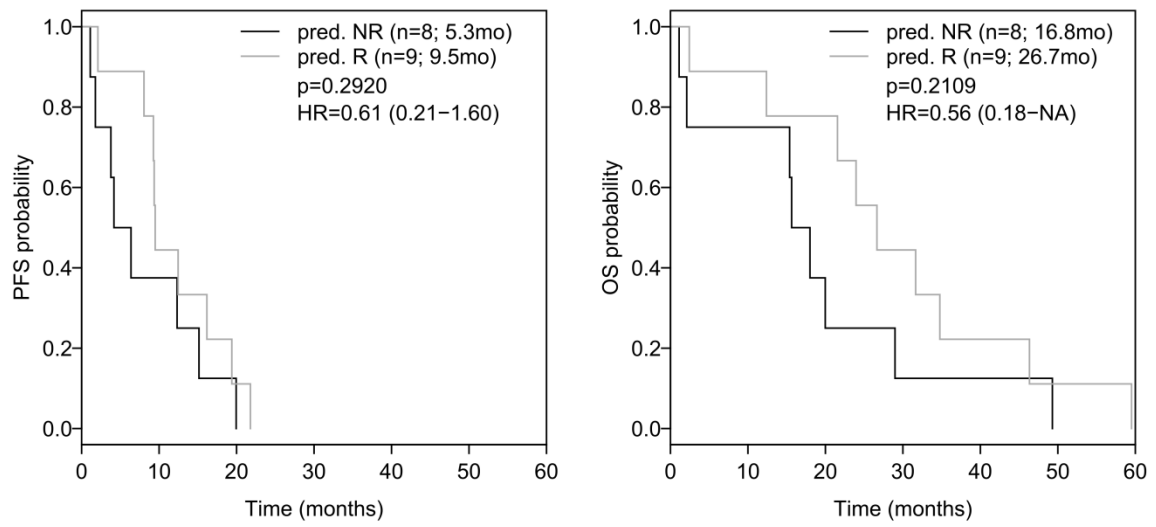

**Table S1.** Selection methods and genomic position for each of the **48 genes** (48 CpGs) selected for further validation in the *optimization set* and *control set*.

| Gene       | Probe-ID   | Chr | Position  | Feature relation | Delta beta | IMA/DMR | LR (AUC>0.85) | Biology |
|------------|------------|-----|-----------|------------------|------------|---------|---------------|---------|
| ISL1       | cg06875227 | 5   | 50683378  | Body_island      | 0.240      | 1       | 1             | 0       |
| SMAD4      | cg21417204 | 18  | 48609268  | 3'UTR_none       | 0.230      | 1       | 0             | 1       |
| GNAS       | cg21971807 | 20  | 57471654  | Body_shelf       | 0.213      | 0       | 1             | 1       |
| M6PR       | cg16831050 | 12  | 9093884   | 3'UTR_none       | 0.194      | 1       | 1             | 0       |
| TMBIM6     | cg09604167 | 12  | 50134882  | TSS1500_shore    | 0.180      | 0       | 1             | 1       |
| PFKFB3     | cg24636244 | 10  | 6221185   | Body_none        | 0.152      | 0       | 1             | 1       |
| POLK       | cg05673882 | 5   | 74862702  | Body_none        | 0.251      | 1       | 0             | 0       |
| MLH1       | cg24607398 | 3   | 37033625  | 1stExon_shore    | 0.233      | 0       | 0             | 1       |
| EBF2       | cg12863565 | 8   | 25902558  | TSS200_island    | 0.215      | 1       | 1             | 0       |
| NF1        | cg14557268 | 17  | 29596696  | Body_none        | 0.201      | 0       | 0             | 1       |
| PCSK6      | cg16179521 | 15  | 102009894 | Body_none        | 0.192      | 0       | 1             | 0       |
| NOX4       | cg24309428 | 11  | 89224381  | 1stExon_shore    | 0.191      | 0       | 1             | 0       |
| FLT1       | cg02188358 | 13  | 29068150  | Body_island      | 0.188      | 0       | 0             | 1       |
| PKNOX2     | cg19704853 | 11  | 125133609 | 5'UTR_none       | 0.188      | 0       | 1             | 0       |
| CACNA1G    | cg01811187 | 17  | 48637445  | TSS1500_island   | 0.184      | 0       | 0             | 1       |
| UNC119     | cg06452513 | 17  | 26879897  | TSS1500_shore    | 0.150      | 0       | 1             | 0       |
| ODZ4       | cg08913922 | 11  | 79149704  | 5'UTR_island     | 0.257      | 1*      | 0             | 0       |
| KIF7       | cg10210369 | 15  | 90197924  | 5'UTR_shore      | 0.249      | 0       | 1             | 0       |
| SIGLEC15   | cg13741394 | 18  | 43417389  | Body_island      | 0.219      | 0       | 1             | 0       |
| APC        | cg24332422 | 5   | 112073686 | 5'UTR_none       | 0.208      | 1       | 0             | 1       |
| DKK3       | cg24543696 | 11  | 12031046  | TSS1500_shore    | 0.172      | 1       | 0             | 1       |
| DAB1       | cg27510182 | 1   | 58715553  | 5'UTR_island     | 0.266      | 1       | 0             | 0       |
| GFI1       | cg04838747 | 1   | 92950450  | 5'UTR_island     | 0.196      | 1       | 0             | 0       |
| EBF3       | cg15991708 | 10  | 131671760 | Body_none        | -0.156     | 1       | 0             | 0       |
| ZNF536     | cg23458168 | 19  | 30864867  | 5'UTR_shore      | -0.210     | 1*      | 0             | 0       |
| OGDHL      | cg18221168 | 10  | 50971607  | TSS1500_shore    | -0.213     | 1*      | 0             | 0       |
| S100A7A    | cg12067024 | 1   | 153387689 | TSS1500_none     | -0.234     | 0       | 1             | 0       |
| CDC42BPB   | cg04987734 | 14  | 103415873 | Body_none        | -0.267     | 1       | 1             | 0       |
| SNTG2      | cg00009523 | 2   | 1165351   | Body_shore       | -0.324     | 0       | 1             | 0       |
| SNRPN      | cg22159025 | 15  | 25201020  | 5'UTR_island     | -0.162     | 1       | 0             | 0       |
| C6orf10    | cg06192961 | 6   | 32294470  | Body_none        | -0.206     | 0       | 1             | 0       |
| AGPAT4     | cg01771096 | 6   | 161638100 | Body_none        | -0.217     | 0       | 1             | 0       |
| COL4A1     | cg19234894 | 13  | 110880172 | Body_none        | -0.219     | 0       | 0             | 1       |
| D2HGDH     | cg19040077 | 2   | 242702749 | Body_none        | -0.219     | 0       | 1             | 0       |
| PRDM16     | cg26222332 | 1   | 3072643   | Body_shore       | -0.220     | 0       | 1             | 0       |
| ARSJ       | cg26728709 | 4   | 114823338 | 3'UTR_none       | -0.220     | 1       | 0             | 0       |
| ELMO1      | cg05642546 | 7   | 37298927  | Body_none        | -0.222     | 0       | 1             | 1       |
| DPP6       | cg24255201 | 7   | 154684926 | 3'UTR_shore      | -0.228     | 0       | 1             | 0       |
| MYBPHL     | cg17797848 | 1   | 109842096 | Body_none        | -0.251     | 1       | 0             | 0       |
| RGAG1      | cg05902740 | X   | 109698667 | 3'UTR_none       | -0.154     | 1       | 1             | 0       |
| FHL1       | cg13980651 | X   | 135233206 | Body_shelf       | -0.156     | 1       | 1             | 0       |
| ARHGEF6    | cg09517019 | X   | 135863323 | 5'UTR_none       | -0.162     | 0       | 1             | 1       |
| NCRNA00182 | cg01592490 | X   | 73325026  | Body_shore       | -0.171     | 1       | 1             | 0       |
| STARD8     | cg25630838 | X   | 67913165  | TSS1500_shore    | -0.178     | 0       | 1             | 1       |
| RUNX1      | cg05644223 | 21  | 36412119  | TSS1500_none     | -0.235     | 1       | 0             | 1       |
| SERPINB2   | cg20875821 | 18  | 61557735  | 5'UTR_none       | -0.276     | 1       | 1             | 0       |
| WNT2B      | cg25320499 | 1   | 113052563 | Body_shore       | -0.156     | 1       | 1             | 1       |
| IGF2BP1    | cg07738730 | 17  | 47077165  | Body_shore       | -0.187     | 1       | 1             | 1       |

\* significantly demethylated regions in R versus NR including all samples (tumor and metastasis)

There are two types of information given for the respective CpG: 1. position in relation to the gene (1stExon: within 1st exon of the gene, 3'UTR: within 3' untranslated region, 5'UTR: within 5' untranslated region, Body: within remaining exons or introns of that gene, TSS1500: within 1500 bp upstream of the transcription start site, TSS200 within 200 bp upstream of the transcription start site) and 2. position in relation to a CpG island (island: within a CpG island, shelf: within ~4 Kb from a CpG island, shore: within ~2 Kb from a CpG island, none: >4kb away from a CpG island).

**Table S2.** 26 of 48 gene regions presenting CpGs significantly ( $p < 0.05$ ) associated with progression free survival (PFS) or overall survival (OS) or with an area under curve (AUC)  $> 0.7$  from receiver operating characteristics separating responders (*R*) from non-responders (*NR*) in the *optimization set* (chemotherapy plus bevacizumab). These CpG-sites did not show any significant association with PFS in the *control set* (chemotherapy alone), except 5 single CpG sites, where the Hazard ratio showed in the opposite direction (marked in grey).

| CHR   | POSITION  | GENE     | Optimization set |        |      |        |      | Control set |        |
|-------|-----------|----------|------------------|--------|------|--------|------|-------------|--------|
|       |           |          | PFS              |        | OS   |        | AUC  | PFS         |        |
|       |           |          | HR10             | P      | HR10 | P      |      | HR10        | P      |
| chr1  | 58715653  | DAB1     | 0.82             | 0.1891 | 0.68 | 0.0309 | 0.81 | 3.25        | 0.0348 |
| chr1  | 92950472  | GFI1     | 0.82             | 0.0073 | 0.79 | 0.0044 | 0.54 | 1.50        | 0.0459 |
| chr1  | 92950478  | GFI1     | 0.81             | 0.0067 | 0.80 | 0.0058 | 0.54 | 1.74        | 0.0259 |
| chr1  | 92950480  | GFI1     | 0.83             | 0.0178 | 0.79 | 0.0055 | 0.54 | 2.19        | 0.0219 |
| chr1  | 92950560  | GFI1     | 1.00             | 0.9849 | 0.98 | 0.8515 | 0.74 | 2.48        | 0.0375 |
| chr1  | 113052446 | WNT2B    | 0.98             | 0.9007 | 0.87 | 0.3691 | 0.74 | 1.36        | 0.3921 |
| chr1  | 113052487 | WNT2B    | 0.98             | 0.7963 | 1.03 | 0.7531 | 0.74 | 1.03        | 0.9026 |
| chr1  | 113052544 | WNT2B    | 1.01             | 0.9443 | 0.98 | 0.7775 | 0.85 | 0.97        | 0.8265 |
| chr1  | 153387609 | S100A7A  | 1.20             | 0.0127 | 1.22 | 0.0106 | 0.61 | 0.89        | 0.4942 |
| chr1  | 153387661 | S100A7A  | 1.38             | 0.0011 | 1.35 | 0.0025 | 0.66 | 0.93        | 0.7720 |
| chr1  | 153387689 | S100A7A  | 1.16             | 0.0489 | 1.17 | 0.0311 | 0.57 | 0.89        | 0.5018 |
| chr2  | 1165409   | SNTG2    | 1.12             | 0.0883 | 1.14 | 0.0477 | 0.64 | 0.89        | 0.5633 |
| chr3  | 37033489  | MLH1     | 0.86             | 0.0353 | 0.87 | 0.0553 | 0.82 | 0.88        | 0.4677 |
| chr3  | 37033600  | MLH1     | 0.91             | 0.1270 | 0.93 | 0.2475 | 0.76 | 1.01        | 0.9575 |
| chr3  | 37033625  | MLH1     | 0.80             | 0.0039 | 0.85 | 0.0246 | 0.73 | 0.78        | 0.3365 |
| chr3  | 37033632  | MLH1     | 0.86             | 0.0146 | 0.87 | 0.0274 | 0.73 | 0.91        | 0.6652 |
| chr3  | 37033662  | MLH1     | 0.83             | 0.0228 | 0.88 | 0.0849 | 0.72 | 0.99        | 0.9479 |
| chr4  | 114823338 | ARSJ     | 1.22             | 0.0480 | 1.25 | 0.0241 | 0.55 | 0.92        | 0.6552 |
| chr4  | 114823347 | ARSJ     | 1.20             | 0.0795 | 1.23 | 0.0433 | 0.53 | 0.90        | 0.5988 |
| chr5  | 74862630  | POLK     | 0.77             | 0.0001 | 0.80 | 0.0009 | 0.66 | 1.14        | 0.4531 |
| chr5  | 74862640  | POLK     | 0.76             | 0.0001 | 0.83 | 0.0069 | 0.72 | 1.20        | 0.3528 |
| chr5  | 74862646  | POLK     | 0.78             | 0.0004 | 0.82 | 0.0041 | 0.65 | 1.11        | 0.4619 |
| chr5  | 74862658  | POLK     | 0.80             | 0.0013 | 0.84 | 0.0103 | 0.62 | 1.18        | 0.2869 |
| chr5  | 74862702  | POLK     | 0.87             | 0.0344 | 0.88 | 0.0527 | 0.50 | 1.91        | 0.0577 |
| chr5  | 112073686 | APC      | 0.87             | 0.0385 | 0.88 | 0.0657 | 0.51 | 1.23        | 0.1245 |
| chr7  | 37298864  | ELMO1    | 1.15             | 0.1131 | 1.20 | 0.0371 | 0.62 | 0.79        | 0.1751 |
| chr7  | 154684831 | DPP6     | 1.10             | 0.2670 | 1.10 | 0.3421 | 0.73 | 0.64        | 0.1048 |
| chr10 | 131671776 | EBF3     | 1.07             | 0.2163 | 1.13 | 0.0459 | 0.55 | 0.96        | 0.7753 |
| chr10 | 131671849 | EBF3     | 1.09             | 0.1623 | 1.14 | 0.0390 | 0.51 | 0.88        | 0.5308 |
| chr11 | 12031097  | DKK3     | 0.86             | 0.0267 | 0.89 | 0.0741 | 0.52 | 1.04        | 0.8212 |
| chr11 | 12031099  | DKK3     | 0.86             | 0.0254 | 0.91 | 0.1212 | 0.51 | 1.16        | 0.4173 |
| chr11 | 12031113  | DKK3     | 0.87             | 0.0322 | 0.90 | 0.0850 | 0.50 | 0.94        | 0.7656 |
| chr11 | 12031148  | DKK3     | 0.81             | 0.0330 | 0.93 | 0.4216 | 0.55 | 0.83        | 0.5669 |
| chr11 | 79149578  | ODZ4     | 0.84             | 0.1003 | 0.80 | 0.0404 | 0.61 | 1.09        | 0.8291 |
| chr11 | 79149584  | ODZ4     | 0.89             | 0.2337 | 0.77 | 0.0288 | 0.60 | 2.10        | 0.1253 |
| chr11 | 89224417  | NOX4     | 0.91             | 0.1194 | 0.88 | 0.0440 | 0.68 | 1.05        | 0.7361 |
| chr11 | 89224420  | NOX4     | 0.95             | 0.3956 | 0.88 | 0.0442 | 0.55 | 0.98        | 0.9243 |
| chr12 | 50134851  | TMBIM6   | 0.83             | 0.0069 | 0.82 | 0.0041 | 0.73 | 1.00        | 0.9895 |
| chr13 | 29068150  | FLT1     | 1.06             | 0.3361 | 1.03 | 0.6797 | 0.72 | 1.12        | 0.4251 |
| chr13 | 110880253 | COL4A1   | 1.26             | 0.0478 | 1.20 | 0.1168 | 0.56 | 0.89        | 0.5589 |
| chr14 | 103415861 | CDC42BPB | 0.84             | 0.0463 | 0.88 | 0.1269 | 0.51 | 1.01        | 0.9389 |
| chr15 | 25200853  | SNRPN    | 1.16             | 0.0746 | 1.20 | 0.0399 | 0.66 | 1.05        | 0.8432 |
| chr15 | 25200916  | SNRPN    | 1.16             | 0.0811 | 1.19 | 0.0451 | 0.66 | 0.97        | 0.8920 |
| chr15 | 25200919  | SNRPN    | 1.18             | 0.0474 | 1.22 | 0.0172 | 0.63 | 1.00        | 0.9870 |
| chr15 | 25200935  | SNRPN    | 1.19             | 0.0495 | 1.21 | 0.0324 | 0.70 | 0.99        | 0.9612 |
| chr15 | 25200964  | SNRPN    | 1.22             | 0.0235 | 1.20 | 0.0376 | 0.74 | 0.98        | 0.9402 |
| chr15 | 25201053  | SNRPN    | 1.10             | 0.1656 | 1.15 | 0.0363 | 0.52 | 0.94        | 0.7058 |
| chr15 | 90197905  | KIF7     | 0.94             | 0.2946 | 0.93 | 0.2446 | 0.73 | 1.09        | 0.7882 |
| chr15 | 90198009  | KIF7     | 1.18             | 0.4839 | 1.41 | 0.1542 | 0.74 | 0.77        | 0.6708 |
| chr15 | 90198067  | KIF7     | 1.10             | 0.5194 | 0.98 | 0.8618 | 0.72 | 0.72        | 0.3541 |
| chr15 | 102009885 | PCSK6    | 0.87             | 0.0378 | 0.84 | 0.0138 | 0.51 | 1.05        | 0.8756 |

|       |          |          |      |        |      |        |      |      |        |
|-------|----------|----------|------|--------|------|--------|------|------|--------|
| chr17 | 26879866 | UNC119   | 0.84 | 0.0439 | 0.97 | 0.6707 | 0.61 | 1.22 | 0.2384 |
| chr18 | 43417235 | SIGLEC15 | 0.83 | 0.0440 | 0.85 | 0.1053 | 0.68 | 0.85 | 0.4160 |
| chr18 | 43417241 | SIGLEC15 | 0.76 | 0.0186 | 0.74 | 0.0151 | 0.68 | 0.96 | 0.8412 |
| chr20 | 57471607 | GNAS     | 0.81 | 0.0004 | 0.89 | 0.0343 | 0.70 | 0.93 | 0.5070 |
| chr20 | 57471654 | GNAS     | 0.82 | 0.0042 | 0.79 | 0.0003 | 0.60 | 1.03 | 0.8542 |
| chr20 | 57471660 | GNAS     | 0.83 | 0.0021 | 0.84 | 0.0015 | 0.63 | 1.03 | 0.8533 |
| chr20 | 57471672 | GNAS     | 0.82 | 0.0041 | 0.82 | 0.0011 | 0.51 | 1.02 | 0.9169 |
| chr20 | 57471758 | GNAS     | 0.79 | 0.0034 | 0.79 | 0.0019 | 0.57 | 1.14 | 0.5454 |

HR10: hazard ratio for 10% rise of methylation; AUC: area under receiver operating characteristics curve; PFS: progression-free survival; OS: overall survival;

**Table S3.** Selected CpGs for methylation analysis in the **9-gene methylation signature** in the *learning set* and in the *optimization set* (3 gene methylation signature is indicated by \*)

| GENE           | LEARNING SET |       |           |        |      | OPTIMIZATION SET |           |        |      |
|----------------|--------------|-------|-----------|--------|------|------------------|-----------|--------|------|
|                | CG ID        | CHR   | POS       | R-NR   | AUC  | CHR              | POS       | R-NR   | AUC  |
| <i>WNT2B</i>   | cg25320499   | chr1  | 113052563 | -0.132 | 0.81 | chr1             | 113052544 | -0.186 | 0.85 |
| <i>MLH1*</i>   | cg24607398   | chr3  | 37033625  | 0.216  | 0.81 | chr3             | 37033625  | 0.173  | 0.73 |
| <i>POLK*</i>   | cg05673882   | chr5  | 74862702  | 0.229  | 0.78 | chr5             | 74862640  | 0.098  | 0.72 |
| <i>NOX4</i>    | cg24309428   | chr11 | 89224381  | 0.160  | 0.81 | chr11            | 89224417  | 0.192  | 0.68 |
| <i>PKNOX2</i>  | cg19704853   | chr11 | 125133609 | 0.159  | 0.85 | chr11            | 125133601 | 0.180  | 0.70 |
| <i>TMBIM6*</i> | cg09604167   | chr12 | 50134882  | 0.179  | 0.84 | chr12            | 50134851  | 0.132  | 0.73 |
| <i>SNRPN</i>   | cg22159025   | chr15 | 25201020  | -0.155 | 0.83 | chr15            | 25200964  | -0.143 | 0.74 |
| <i>UNC119</i>  | cg06452513   | chr17 | 26879897  | 0.144  | 0.82 | chr17            | 26879897  | -0.019 | 0.55 |
| <i>GNAS</i>    | cg21971807   | chr20 | 57471654  | 0.186  | 0.80 | chr20            | 57471607  | 0.190  | 0.70 |

CG ID is the identifier from the 450k Illumina methylation arrays; POS is the position in the hg19 genome assembly; R-NR is the mean difference in methylation levels ( $\Delta\beta$ ) from responders *versus* non-responders; AUC area under the receiver operating characteristics curve separating responders from non-responders.

**Table S4.** Parameters of the logistic regression models of the **9-gene methylation signature** and the **3-gene methylation signature** learned from the data in the learning set.

| 9-GENE METHYLATION SIGNATURE |             |            | 3-GENE METHYLATION SIGNATURE |             |            |
|------------------------------|-------------|------------|------------------------------|-------------|------------|
| GENE                         | COEFFICIENT | LR CUTOFF* | GENE                         | COEFFICIENT | LR CUTOFF* |
| <i>Intercept</i>             | -14.077     |            | <i>Intercept</i>             | -10.558     |            |
| <i>WNT2B</i>                 | -0.546      |            | <i>MLH1</i>                  | 7.953       | 0.541      |
| <i>MLH1</i>                  | 9.389       |            | <i>POLK</i>                  | 6.403       |            |
| <i>POLK</i>                  | -5.608      |            | <i>TMBIM6</i>                | 9.864       |            |
| <i>NOX4</i>                  | 8.428       | 0.725      |                              |             |            |
| <i>PKNOX2</i>                | 13.273      |            |                              |             |            |
| <i>TMBIM6</i>                | 17.502      |            |                              |             |            |
| <i>SNRPN</i>                 | -3.942      |            |                              |             |            |
| <i>UNC119</i>                | 0.416       |            |                              |             |            |
| <i>GNAS</i>                  | 0.052       |            |                              |             |            |

\*LR cutoff is the optimized cutoff from the ROC curve analysis from the respective logistic regression model with p>cutoff is predicted responder
